# Supplementary material for: Engineering Pt nanoclusters on CeO2 surface with abundant point defects by in situ confined-domain encapsulation strategy for the catalytic elimination of VOCs
Source: Royal Society of Chemistry journal article supplement (doi:10.1039/d3lf00147d), 2023-10-09
Supplement: d3lf00147d1.pdf [file d3lf00147d1.pdf]

## Supplementary Information

### **Engineering Pt nanoclusters on CeO<sub>2</sub> surface with abundant point defects by in situ confined-domain encapsulation strategy for the catalytic elimination of VOCs**

Siyi Ma<sup>a,b</sup>, Fang Dong<sup>a,c</sup>, Weiliang Han<sup>a</sup>, Weigao Han<sup>a</sup>, Zhicheng Tang<sup>a\*</sup>

*(a. National Engineering Research Center for Fine Petrochemical Intermediates, and State Key Laboratory for Oxo Synthesis and Selective Oxidation, Lanzhou Institute of Chemical Physics, Chinese Academy of Sciences, Lanzhou 730000, China)*

*(b. University of Chinese Academy of Sciences, Beijing 100039, China)*

*(c. Dalian National Laboratory for Clean Energy, Dalian Institute of Chemical Physics, Chinese Academy of Sciences, Dalian, 116023, China)*

\*Corresponding author.

Tel.: +86-931-4968083, E-mail address: tangzhicheng@licp.cas.cn (Z. Tang).

## 1. Experimental section

### 1.1 Preparation of Pt<sub>NP</sub>@CeO<sub>2</sub> (n-NaBH<sub>4</sub>) sample

3.472 g Ce(NO<sub>3</sub>)<sub>3</sub>·6H<sub>2</sub>O and a small amount of PVA (PVA/noble metal mass ratio = 1.2:1.0) were dissolved in 20 mL of deionized water (90 °C). After cooling, a quantity of H<sub>2</sub>PtCl<sub>6</sub> (0.037 mL) was added to form solution A. 18 g of NaOH (6 mol/L) was diluted in 140 mL deionized water to become solution B, and then the solution B was added to solution A to create solution C. The subsequent operation was consistent with the preparation of Pt<sub>NP</sub>@CeO<sub>2</sub>. The prepared sample was labeled as Pt<sub>NP</sub>@CeO<sub>2</sub> (n-NaBH<sub>4</sub>).

### 1.2 Characterization technique

The morphology of the catalyst samples was analyzed by transmission electron microscopy (TEM, JEOL-JEM-2010). The crystal phases of each element in the catalyst were determined by X-ray diffraction instrument (XRD, Japan Smartlabse) (scanning angle of 10°-90°, scanning speed of 0.5 °/min, 60 kV, 55 mA) under the radiation of  $\lambda=1.5406$  nm. The Fourier transform infrared spectroscopy (FTIR) analysis of the samples was performed using Fourier infrared spectrometer (Nexus 870, Nicolet), and ATR technology was used for FTIR analysis. The Raman spectroscopy test was performed on the LabramHR Evolution Raman spectrometer with a 532 nm laser source and a scanning range of 100 to 1,200 cm<sup>-1</sup>. Brunauer-emmett-teller (BET) surface area, the pore size and pore volume of the catalysts was obtained by adsorption and desorption of nitrogen in ASAP 2020 instrument (America Micromeritics). The real content of each metal on the catalyst was obtained

by measuring each catalyst with an Agilent ICP-OES 730 instrument. Infrared spectra were tested with a Nicolet Nexus 870 Fourier transform infrared spectrometer. X-ray photoelectron spectroscopy (XPS) measurements were performed with a Thermo Scientific 250 Xi.

The multifunctional dynamic adsorption instrument TP-5080-D was used to analyze the acidity and redox capacity of the catalyst surface. For H<sub>2</sub>-TPR, a 50 mg sample was heated from room temperature to 900 °C in reduced gas with volume fractions of 5 vol % H<sub>2</sub> and 95 vol % N<sub>2</sub>, and the detector signal was continuously recorded. For the O<sub>2</sub>-TPD test, the catalyst (50 mg) was pretreated with nitrogen (99.9%) for 1 h at 300 °C. When the temperature dropped to 50 °C, the O<sub>2</sub> adsorption was carried out for 60 min. After the adsorption was over, purged with pure He for 0.5 h, and the desorbed O<sub>2</sub> signal was detected at 50-900 °C. The temperature-programmed desorption operation of NH<sub>3</sub>-TPD was similar to that of O<sub>2</sub>-TPD, except that O<sub>2</sub> was changed to NH<sub>3</sub>.

### 1.3 Performance measurement

Tests of activity and stability were essential for probing catalytic performance, mainly with the help of fixed-bed reactor. By pressing and sieving (40-60 mesh), it was possible to obtain 0.4 g of sample, to which 0.7 g of silica (SiO<sub>2</sub>) was subsequently added. The catalyst and SiO<sub>2</sub> were mixed well and poured into the thermostatic zone of the reaction tube, which was stuffed with cotton. The catalyst was exposed to a mixture of toluene (3000 ppm) and air with a flow rate of 200 mL/min and a weight hourly space velocity (WHSV) of 30 000 mL·g<sup>-1</sup>·h<sup>-1</sup>. An on-line

gas chromatograph (GC-6820, Agilent, USA) equipped with a flame ionization detector (FID) was used to detect the concentration of the reactants. Usually, the activity was distinguished by the reaction temperature when the toluene conversion was 90%. The toluene conversion was calculated as follows:

$$\text{Conversion of toluene} = \frac{\text{Toluene}_{in} - \text{Toluene}_{out}}{\text{Toluene}_{in}} \times 100\%$$

Generally, to test the stability of the catalyst, it is necessary to keep the reaction temperatures at high/low conversion of toluene for about 15 hours. And the concentration of the reactants was measured every hour to calculate the toluene conversion. In general, the specific equation for carbon balance was as follows and the error of carbon balance is about  $\pm 3\%$ :

$$\text{Carbon balance (\%)} = \frac{\text{Mole of the overall carbon fed (mol)}}{\text{Mole of the outflowed carbon (mol)}}$$

The catalytic performance could also be identified by apparent activation energy ( $E_a$ ), which was measured as follows [S1]:

$$\ln r = \frac{-E_a}{RT} + C \quad (1)$$

In equation (1),  $r$  represented the reaction rate ( $\text{mol}\cdot\text{s}^{-1}$ ),  $T$  referred to the reaction temperatures, and  $C$  was a constant term.

$$r = \frac{F \times X_{\text{toluene}}}{W} \quad (2)$$

In equation (2),  $X_{\text{toluene}}$  denoted the conversion of toluene,  $F$  indicated the feeding rate ( $\text{mol}\cdot\text{s}^{-1}$ ), and  $W$  corresponded to the mass of catalyst. Therefore, the plot of  $\ln r$  and  $1000/T$  yielded the  $E_a$  value.

We performed a kinetic study of the catalysts. The specific toluene reaction rates

through the catalyst's specific surface area ( $R_s$ ) and the catalyst's mass ( $R_m$ ) were calculated required the following equation [1]:

$$R_s = \frac{F \times \eta_{toluene}}{S_{BET}}$$

$$R_m = \frac{F \times \eta_{toluene}}{W}$$

$$\eta_{toluene} = \log \frac{1}{1 - \frac{X_{toluene}}{100}}$$

Table S1 Survey of literature data on catalytic oxidation of VOCs.

| Catalysts                          | T <sub>90</sub> (°C) | Pt content (wt%) | VOCs    | WHSV (mL·h <sup>-1</sup> ·g <sup>-1</sup> ) | Concentration of VOCs (ppm) | Ref.      |
|------------------------------------|----------------------|------------------|---------|---------------------------------------------|-----------------------------|-----------|
| Pt <sub>NC</sub> @CeO <sub>2</sub> | 272                  | 0.0075           | Toluene | 30000                                       | 3000                        | This work |
| Pt/CeTi-11                         | 152                  | 0.5              | Benzene | 15000                                       | 1000                        | [2]       |
| Pt-CeO <sub>2</sub> /BEA-P         | 60                   | 0.07             | Toluene | 120000                                      | 35                          | [3]       |
| Pt/CeO <sub>2</sub> -r             | 144                  | 1.05             | Toluene | 45000                                       | 500                         | [4]       |

Table S2 The H<sub>2</sub> consumption (H<sub>2</sub>-TPR) of each catalyst.

| Catalyst                                | H <sub>2</sub> consumption (mmol/g) |                 |
|-----------------------------------------|-------------------------------------|-----------------|
|                                         | The first peak                      | The second peak |
| Pt <sub>NC</sub> @CeO <sub>2</sub>      | 0.41                                | 0.47            |
| Pt <sub>NP</sub> @CeO <sub>2</sub>      | 0.35                                | 0.41            |
| Pt <sub>NP</sub> /CeO <sub>2</sub>      | 0.37                                | 0.36            |
| Pt <sub>NP</sub> @CeO <sub>2</sub> -MOF | 0.51                                | 0.57            |

Table S3 Distribution of infrared absorption bands appearing during the oxidation of toluene over Pt<sub>NC</sub>@CeO<sub>2</sub> catalyst at different times and temperatures.

| Position/cm <sup>-1</sup>        | Assignment                                                                                        | Characteristic of       |
|----------------------------------|---------------------------------------------------------------------------------------------------|-------------------------|
| 3800-3500                        | metal–OH vibration and water molecules coordinated to the surface metal cations                   | metal coordination      |
| 2929, 2834                       | asymmetric and symmetric C–H stretching vibrations of the CH <sub>2</sub> group                   | benzyl                  |
| 2362, 2335                       | \                                                                                                 | CO <sub>2</sub> species |
| 1960, 1867, 1800                 | asymmetric and symmetric C=O stretching vibrations of cyclic anhydrides                           | maleic anhydride        |
| 1750-1720, 1646                  | C=O stretching vibration of aldehydes                                                             | benzaldehyde            |
| 1618, 1505, 1438                 | skeleton stretching vibrations                                                                    | aromatic ring           |
| ~1540, ~1400                     | asymmetric and symmetric COO stretching vibrations of carboxylate group                           | benzoate                |
| ~1370, 1153-1105,<br>~1078, 1063 | C–O stretching vibrations of alkoxide species                                                     | benzyl alcohol          |
| 1362, 1311, 1302                 | \                                                                                                 | maleic anhydride        |
| 1350                             | symmetrical –COO– stretching vibration of acetate species                                         | acetate                 |
| 1291                             | CH <sub>2</sub> deformation vibration of benzyl (C <sub>6</sub> H <sub>5</sub> –CH <sub>2</sub> ) | benzyl                  |
| 1255                             | C–H bending vibration in the plane                                                                | /                       |
| 1224                             | C–O stretching vibration of phenolate (C <sub>6</sub> H <sub>5</sub> O–H)                         | phenolate               |
| ~1030                            | C–H stretching vibration in-plane bending vibration                                               | aromatic ring           |



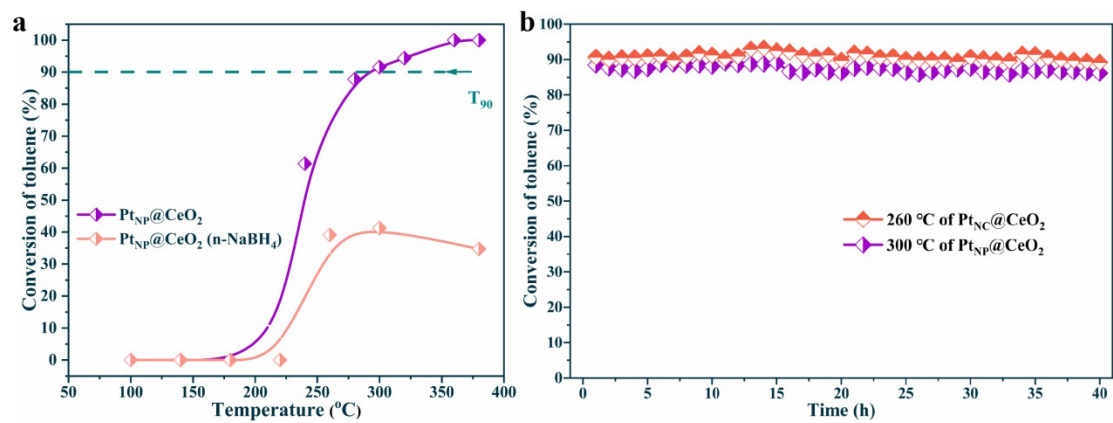

**Fig. S1.** The activity plot (a) of Pt<sub>NP</sub>@CeO<sub>2</sub> and Pt<sub>NP</sub>@CeO<sub>2</sub> (n-NaBH<sub>4</sub>) catalysts.

And the stability tests (b) of Pt<sub>NC</sub>@CeO<sub>2</sub> and Pt<sub>NP</sub>@CeO<sub>2</sub> at T<sub>90</sub>.

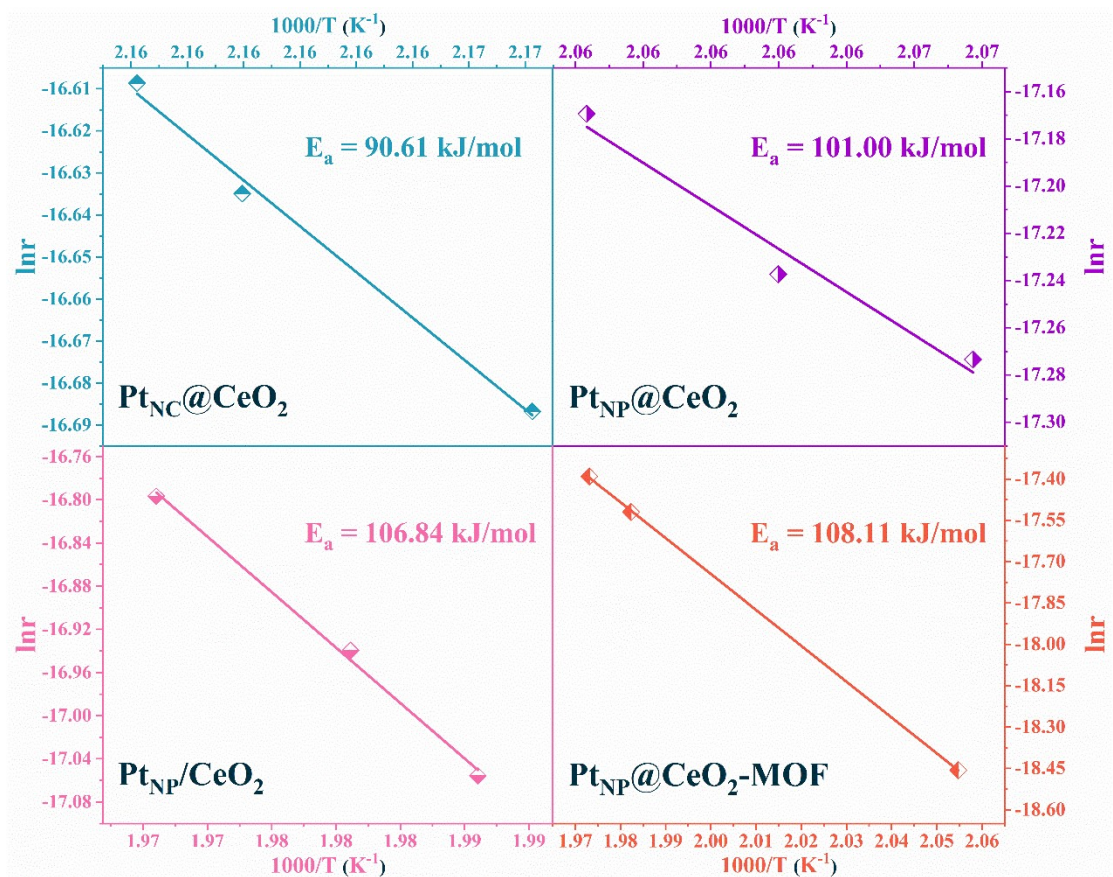

Fig. S2. The Arrhenius plot of four catalysts.

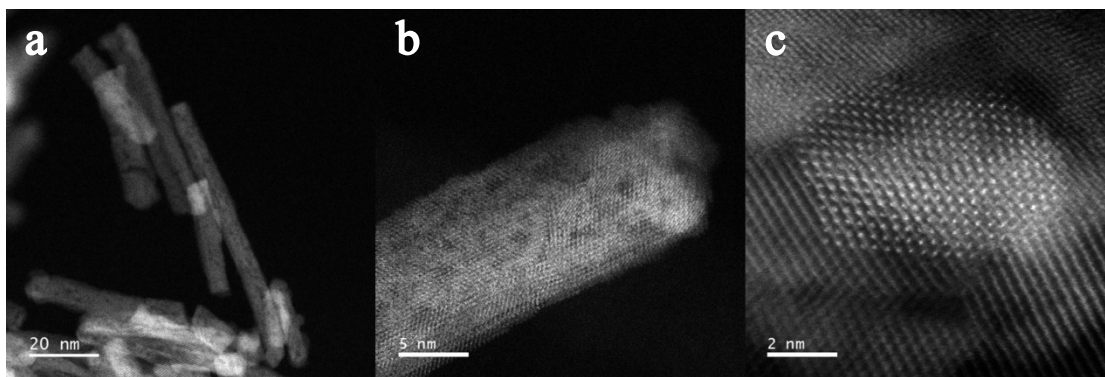

**Fig. S3.** HAADF-STEM images of the Pt<sub>NP</sub>@CeO<sub>2</sub> catalyst.

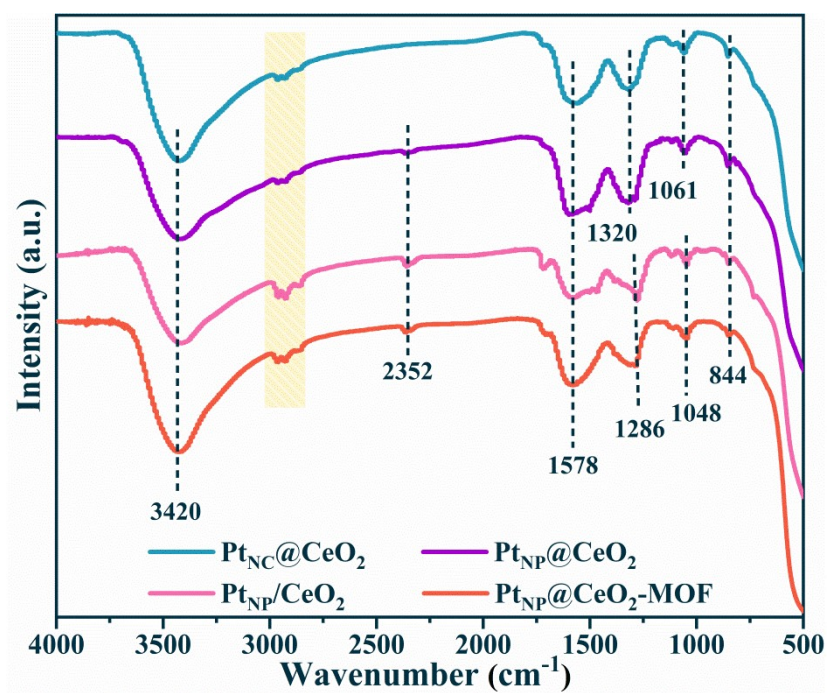

Fig. S4. FTIR spectrum of each catalyst.

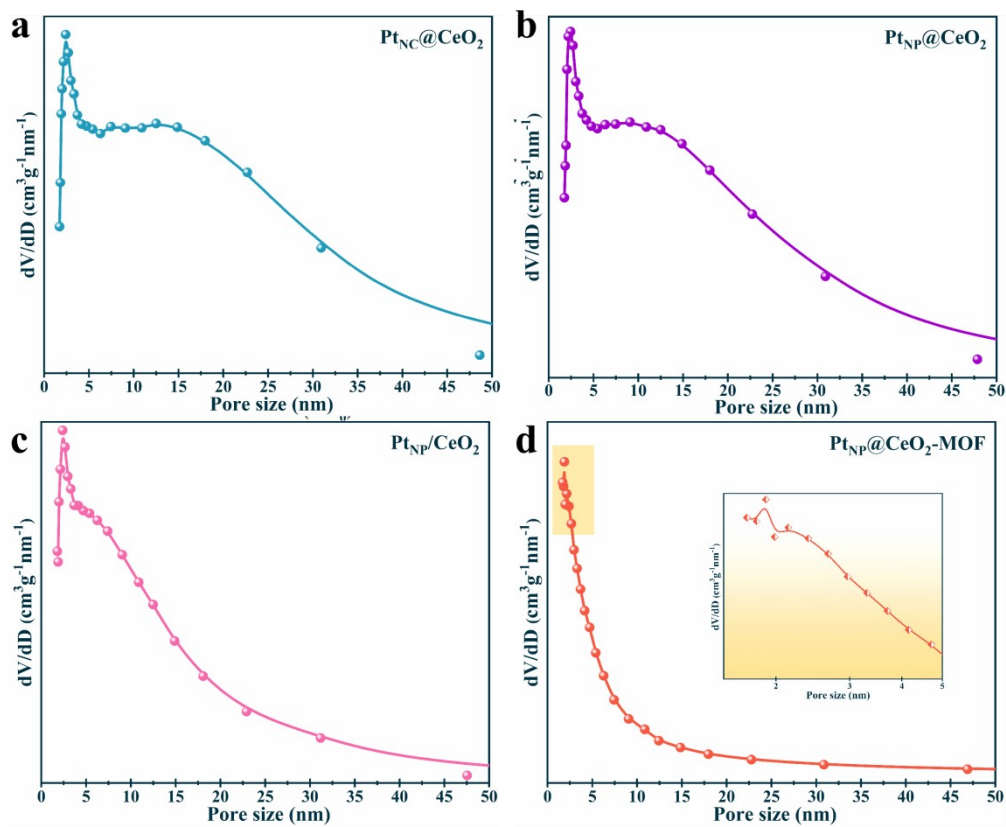

**Fig. S5.** The enlarged drawings about pore size distributions of  $Pt_{NC}@CeO_2$  (a),  $Pt_{NP}@CeO_2$  (b),  $Pt_{NP}/CeO_2$ -R (c), and  $Pt_{NP}@CeO_2$ -MOF (d).

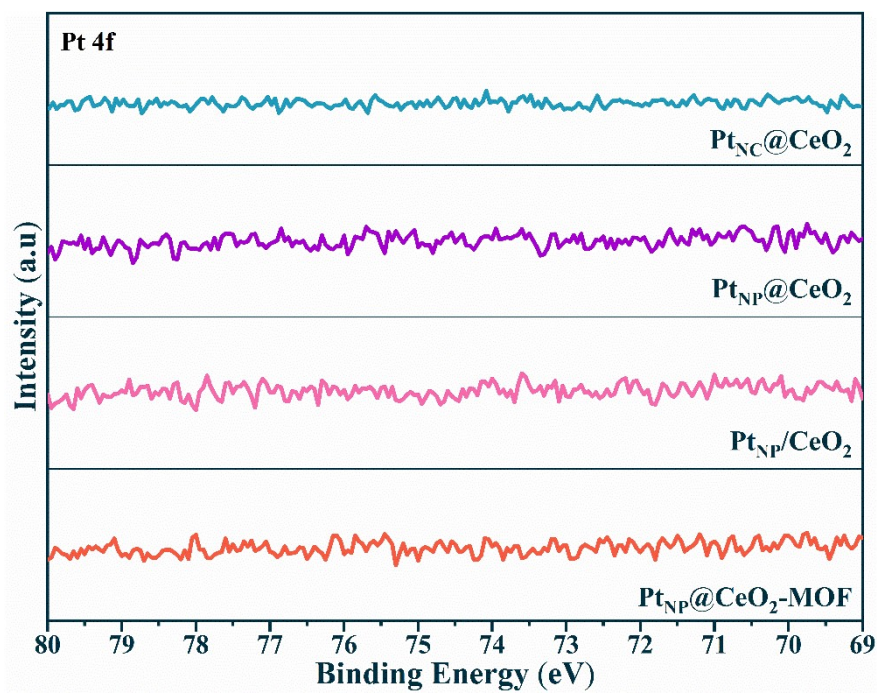

**Fig. S6.** The XPS spectra about Pt 4f of catalysts.

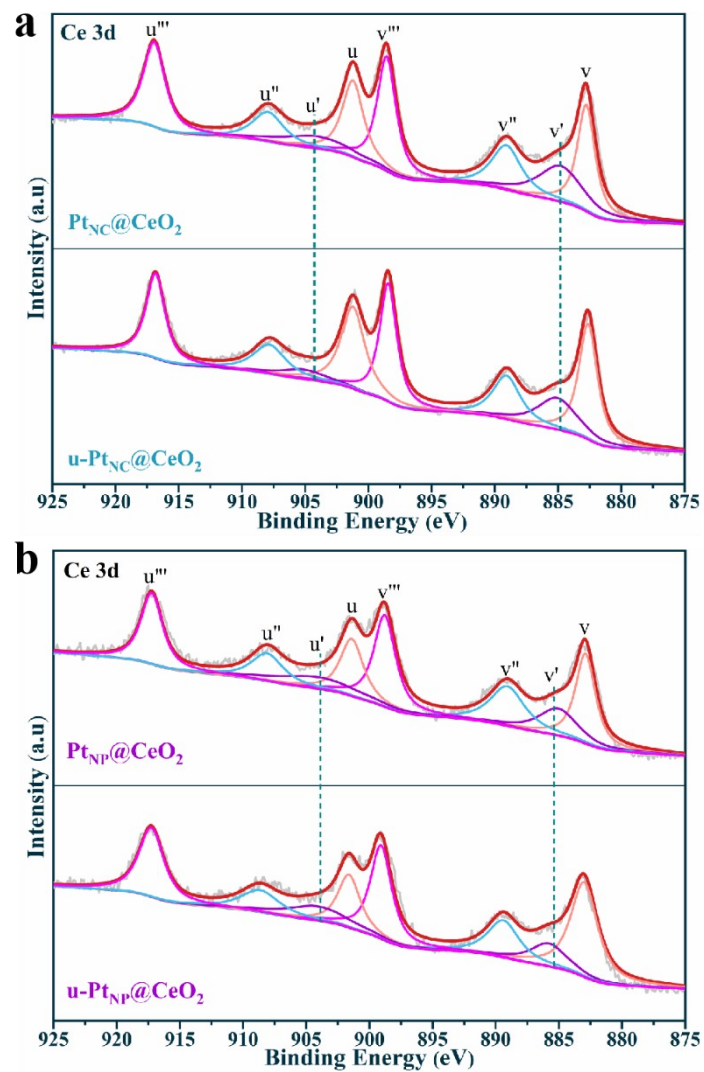

**Fig. S7.** The XPS spectra about Ce 3d of before and used comparison of Pt<sub>NC</sub>@CeO<sub>2</sub> (a) and Pt<sub>NP</sub>@CeO<sub>2</sub> (b) catalysts.

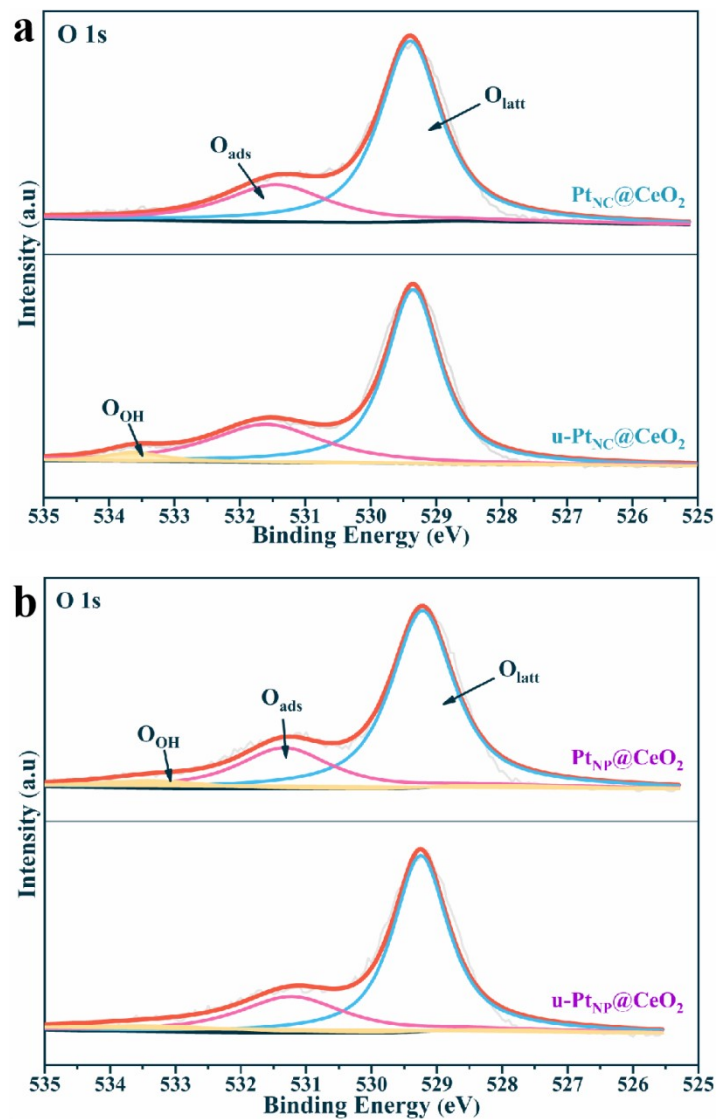

**Fig. S8.** The XPS spectra about O 1s of before and used comparison of Pt<sub>NC</sub>@CeO<sub>2</sub> (a) and Pt<sub>NP</sub>@CeO<sub>2</sub> (b) catalysts.



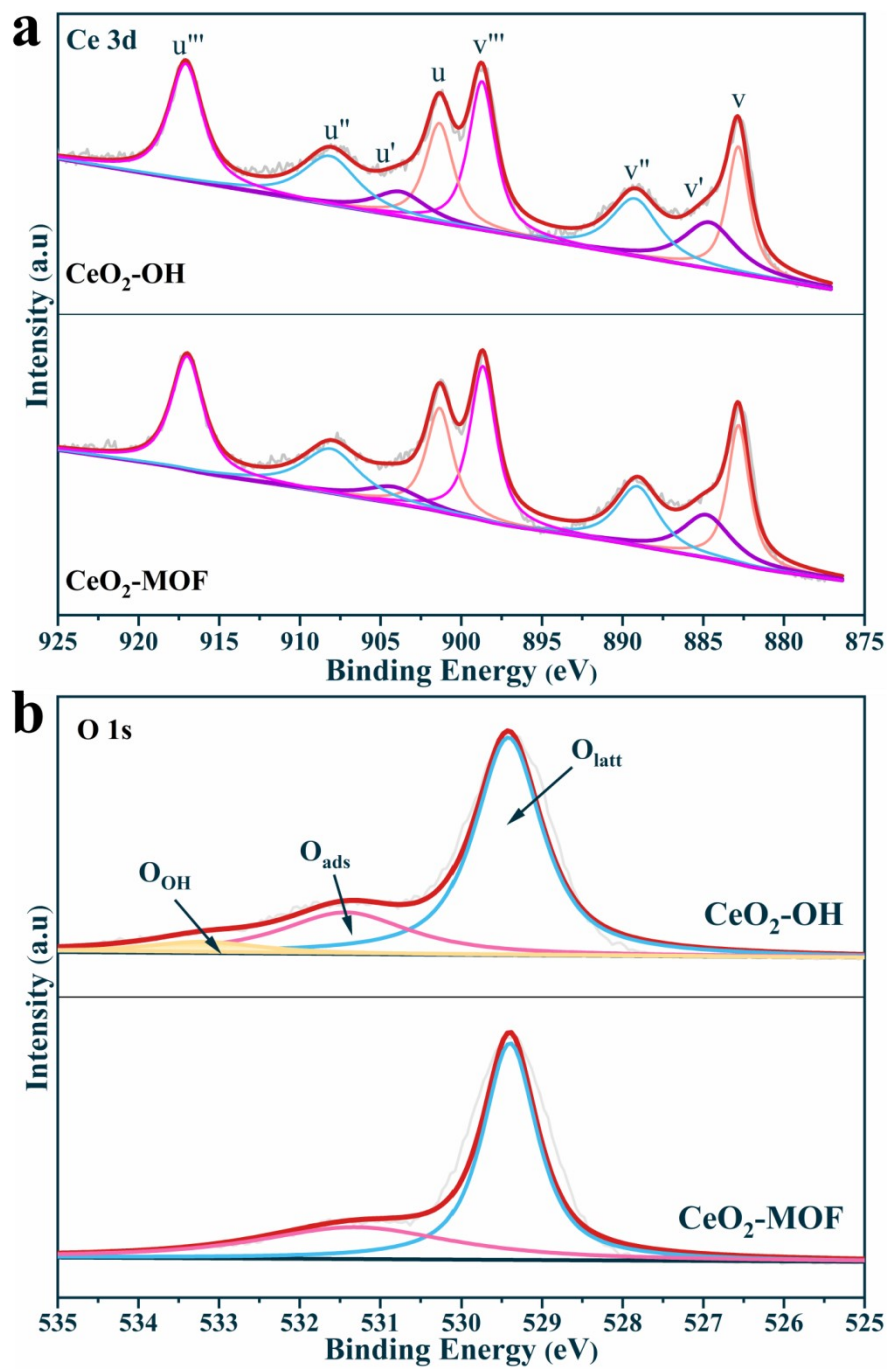

**Fig. S9.** The XPS spectra about Ce 3d (a) and O 1s (b) of CeO<sub>2</sub>-OH and CeO<sub>2</sub>-MOF catalysts.

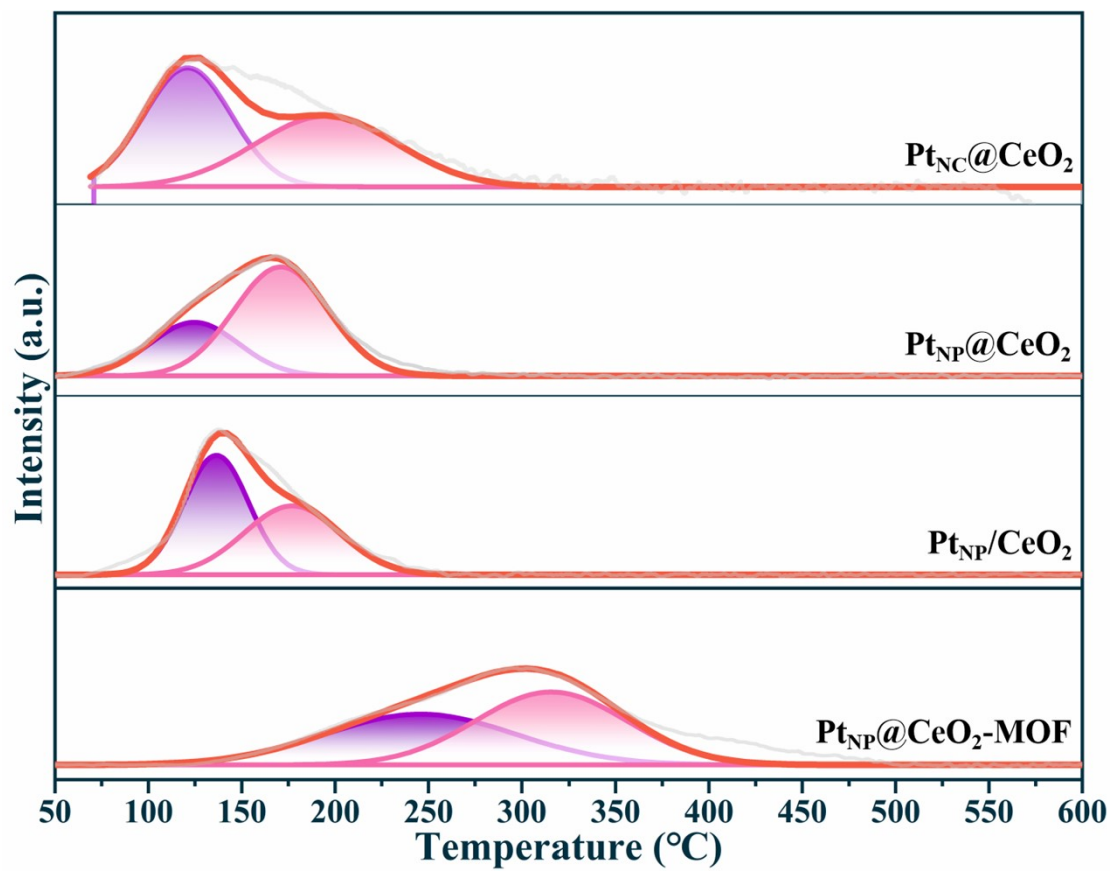

**Fig. S10.**  $H_2$ -TPR curves of the finely fitted peaks of the samples.

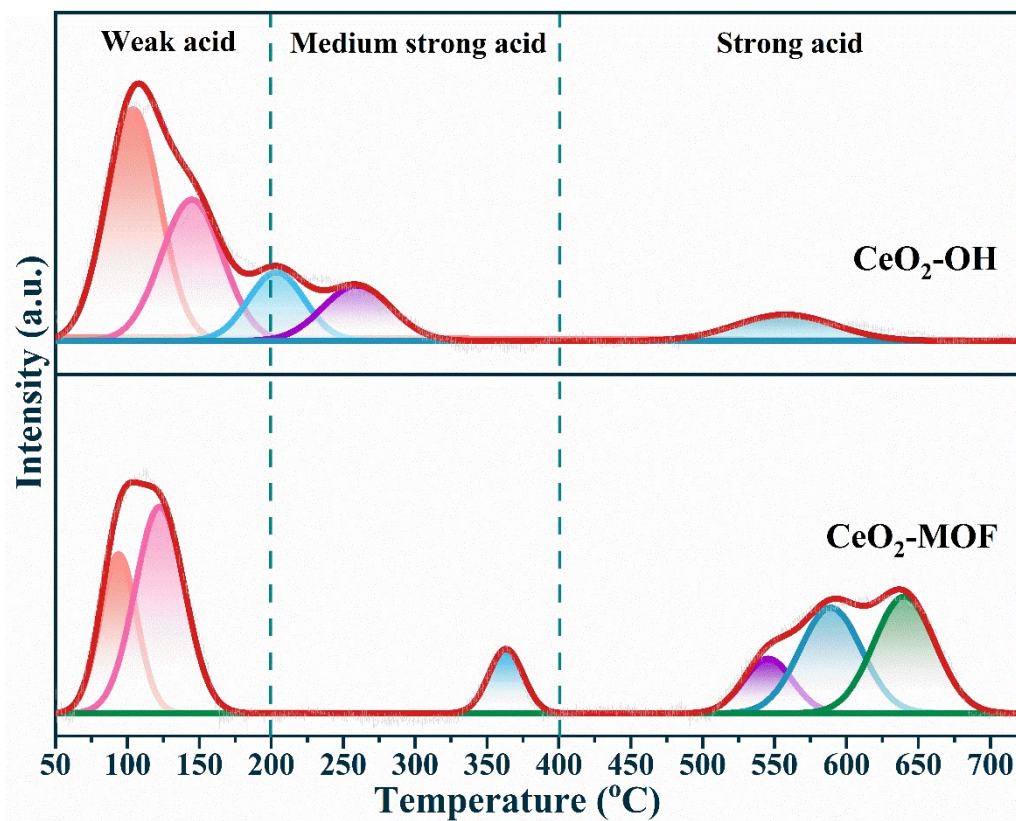

Fig. S11. NH<sub>3</sub>-TPD profiles of CeO<sub>2</sub>-OH and CeO<sub>2</sub>-MOF samples.

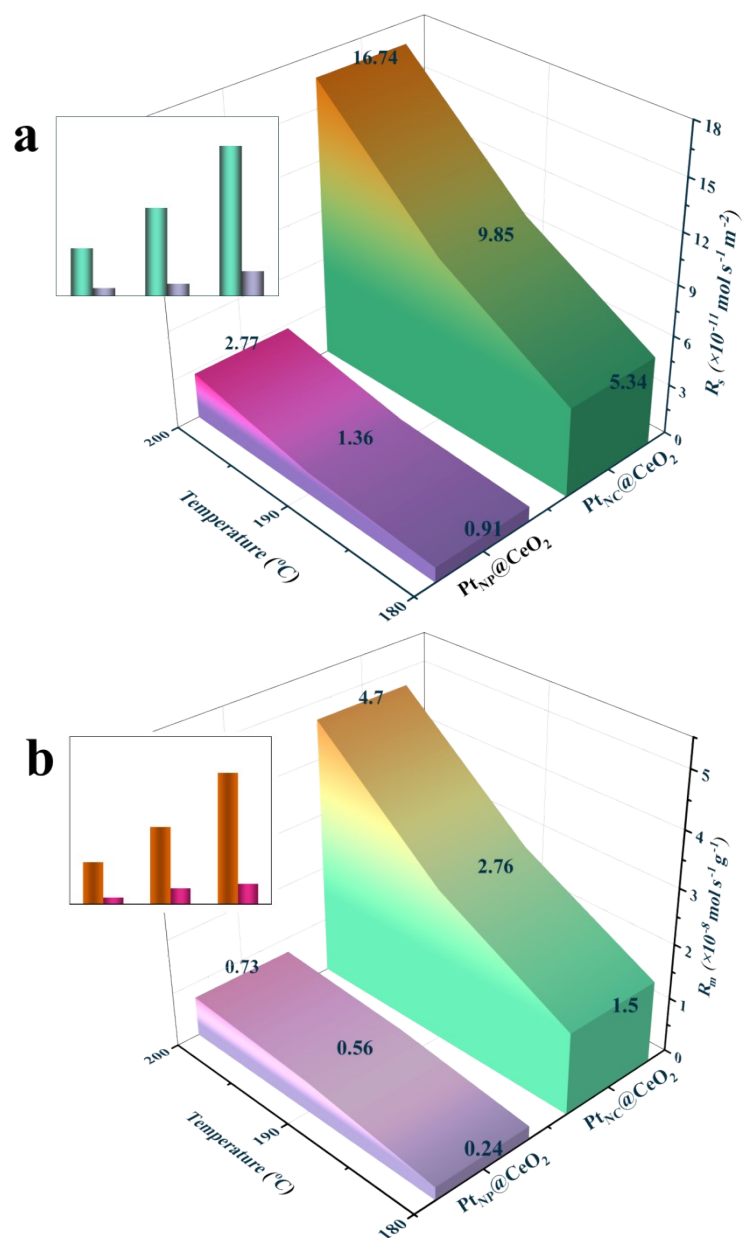

**Fig. S12.** Measurement of the specific toluene reaction rates of the Pt<sub>NC</sub>@CeO<sub>2</sub> and Pt<sub>NP</sub>@CeO<sub>2</sub> catalysts:  $R_s$  (a) and  $R_m$  (b).

## References

- [1] Q. Ren, S. Mo, R. Peng, Z. Feng, M. Zhang, L. Chen, M. Fu, J. Wu, D. Ye, Controllable synthesis of 3D hierarchical  $\text{Co}_3\text{O}_4$  nanocatalysts with various morphologies for the catalytic oxidation of toluene, *J. Mater. Chem. A*, 6 (2018) 498-509.
- [2] Y. Shi, J. Wang, R. Zhou, Pt-support interaction and nanoparticle size effect in Pt/CeO<sub>2</sub>-TiO<sub>2</sub> catalysts for low temperature VOCs removal, *Chemosphere*, 265 (2021) 129127.
- [3] J. Wang, X. Shi, L. Chen, H. Li, M. Mao, G. Zhang, H. Yi, M. Fu, D. Ye, J. Wu, Enhanced performance of low Pt loading amount on Pt-CeO<sub>2</sub> catalysts prepared by adsorption method for catalytic ozonation of toluene, *Appl. Catal. A: Gen.*, 625 (2021) 118342.
- [4] S. Chang, Y. Jia, Y. Zeng, F. Qian, L. Guo, S. Wu, J. Lu, Y. Han, Effect of interaction between different CeO<sub>2</sub> plane and platinum nanoparticles on catalytic activity of Pt/CeO<sub>2</sub> in toluene oxidation, *J. Rare Earth.*, 40 (2022) 1743-1750.
